# Supplementary material for: Isolation and Characterization of Allomelanin from Pathogenic Black Knot Fungus—a Sustainable Source of Melanin
Source: PubMed Central journal article supplement — ACS Omega. 2021 Dec 14;6(51):35514–22. doi: 10.1021/acsomega.1c05030 (PMC8717558; doi:10.1021/acsomega.1c05030), 2021-12-14
Supplement: ao1c05030_si_001.pdf [file ao1c05030_si_001.pdf]

**Supporting Information:**  
**Isolation and characterization of allomelanin from**  
**pathogenic black knot fungus – a sustainable**  
**source of melanin**

Saranshu Singla,<sup>†,‡</sup> K Zin Htut,<sup>†,‡</sup> Runyao Zhu,<sup>†,¶</sup> Amara Davis,<sup>§</sup> Jiayang Ma,<sup>†</sup>  
Qing Zhe Ni,<sup>||</sup> Michael D. Burkart,<sup>||</sup> Christopher Maurer,<sup>⊥</sup> Toshikazu Miyoshi,<sup>†</sup>  
and Ali Dhinojwala<sup>\*,†</sup>

<sup>†</sup>*School of Polymer Science and Polymer Engineering, The University of Akron, Akron OH  
44325*

<sup>‡</sup>*Authors contributed equally*

<sup>¶</sup>*Current Address: Department of Chemical and Biomolecular Engineering, University of  
Notre Dame, Notre Dame IN 46556*

<sup>§</sup>*Department of Chemical Engineering, The University of Akron, Akron OH 44325*

<sup>||</sup>*Department of Chemistry and Biochemistry, University of California, San Diego, CA  
92093*

<sup>⊥</sup>*RedHouse Studio, Cleveland OH*

E-mail: ali4@uakron.edu

## Supporting Figures

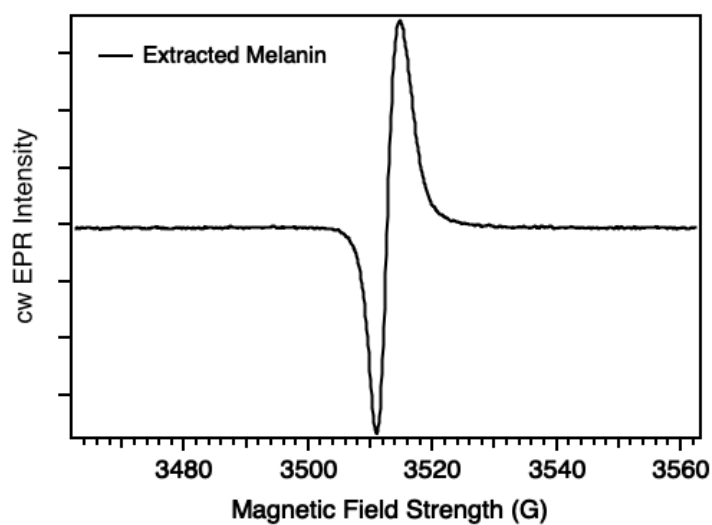

Figure S1: Electron paramagnetic resonance (EPR) spectrum of melanin extracted from black knots collected with the Bruker EMX continuous wave (cw) EPR spectrometer using a microwave frequency of 9.63 GHz. The solid powder sample was loaded into a quartz capillary tube to collect the EPR spectrum.

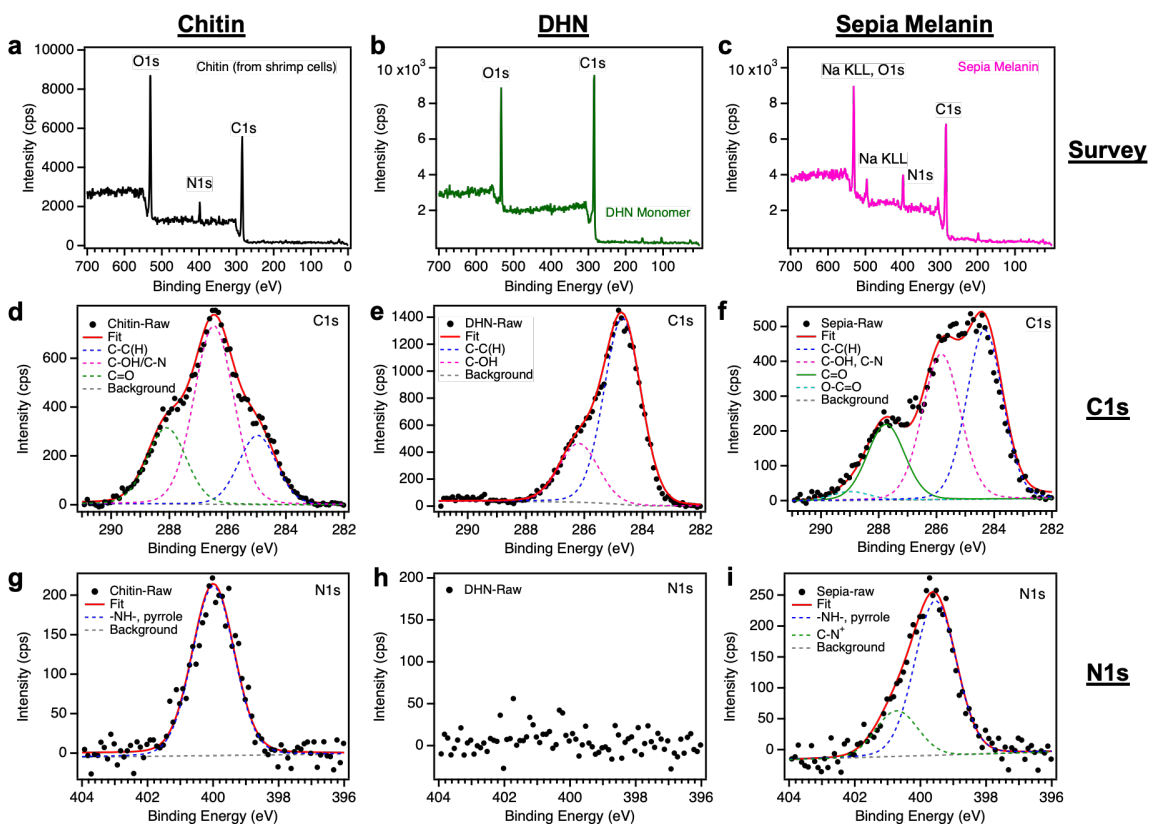

Figure S2: XPS survey scans (a, b, c), high-resolution carbon C1s (d, e, f), and high-resolution nitrogen N1s (g, h, i) spectra for chitin (from shrimp cells), 1, 8-dihydroxynaphthalene (DHN) monomer, and sepia melanin (from Sigma-Aldrich). The bold line (in red) represents the fit to the experimental spectrum (black solid circles), and dotted lines represent the bands from the curve fitting.

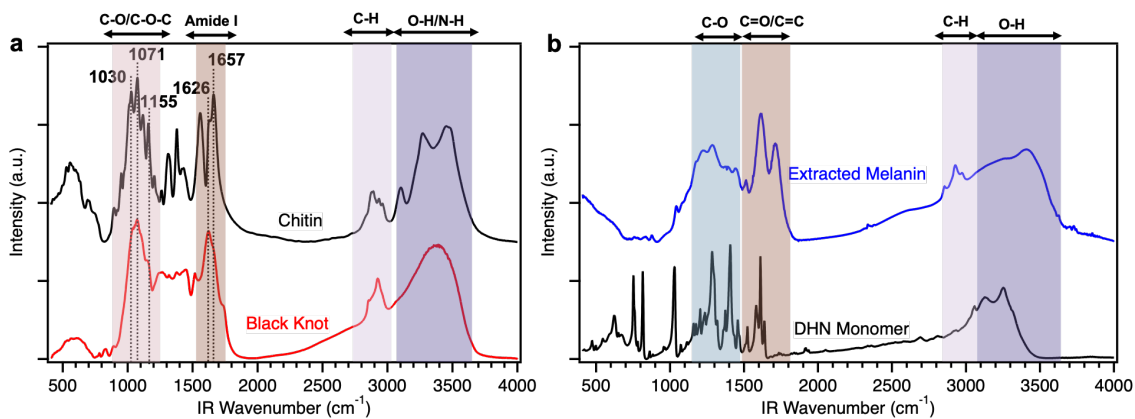

Figure S3: (a) Comparison of FTIR spectra of black knot powder and shrimp chitin. (b) Comparison of FTIR spectra of extracted melanin and DHN monomer. The spectra have been vertically offset for clarity.

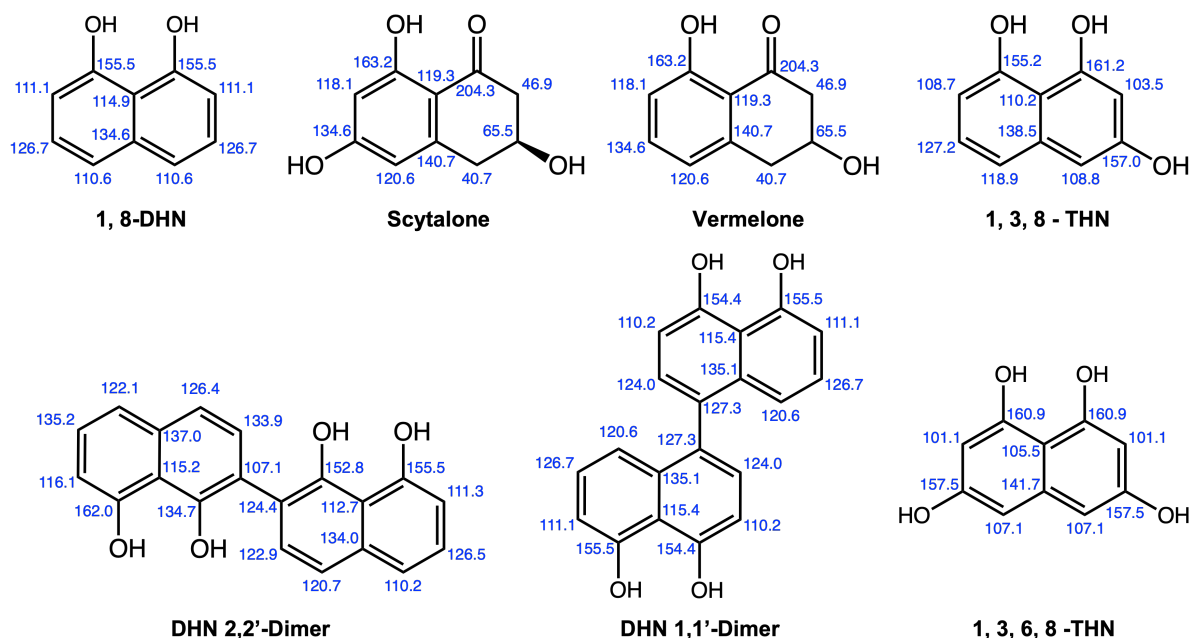

Figure S4:  $^{13}\text{C}$  chemical shift predictions for intermediates in DHN bio-synthetic pathway generated using ChemNMR in ChemDraw v.20.0 (Perkin-Elmer). These predictions match with the experimental chemical shift values observed for extracted melanin spectra shown in Figures 6.

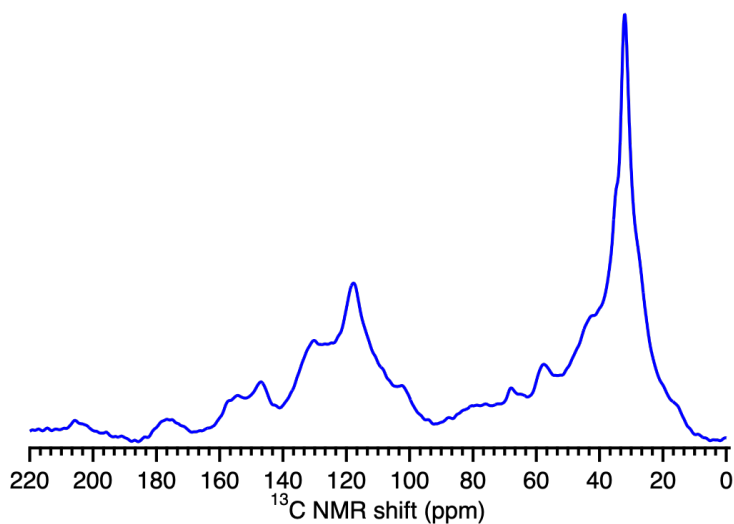

Figure S5:  $^{13}\text{C}$  ssNMR spectrum of melanin extracted from black knot fungus acquired using 750 MHz Magnex Scientific magnet and Bruker spectrometer.

## Supporting Tables

**Table S1: Atomic percentage ( $\% \pm \text{SD}$ ;  $n \geq 2$ ) of different elements detected with XPS from black knot powder, extracted melanin, chitin, 1,8-DHN monomer, and sepia melanin.**

| Sample            | C                | O                | N                | Na              | Cl              |
|-------------------|------------------|------------------|------------------|-----------------|-----------------|
| Black Knot        | 71.45 $\pm$ 5.03 | 24.70 $\pm$ 4.50 | 3.55 $\pm$ 0.95  | -               | -               |
| Extracted melanin | 74.55 $\pm$ 0.95 | 24.53 $\pm$ 1.16 | 0.90 $\pm$ 0.50  | -               | -               |
| Chitin            | 61.35 $\pm$ 0.21 | 31.95 $\pm$ 0.78 | 6.15 $\pm$ 1.20  | -               | -               |
| 1, 8-DHN Monomer  | 79.55 $\pm$ 1.77 | 19.10 $\pm$ 0.99 | 0.20 $\pm$ 0.28  | -               | -               |
| Sepia melanin     | 64.90 $\pm$ 2.55 | 22.05 $\pm$ 0.21 | 10.65 $\pm$ 1.20 | 1.15 $\pm$ 0.49 | 1.25 $\pm$ 0.64 |

**Table S2: Percentage ( $\% \pm \text{SD}$ ,  $n=2$ ) of different types of carbon bonds in black knot powder, extracted melanin, chitin, 1,8-DHN monomer, and sepia melanin extracted using deconvolution of C1s XPS spectra via Multipak software and X-ray Photoelectron Spectroscopy Tool (XPST).**

| Sample            | C-C(H)           | C-OH, C-N        | C=O              | O-C=O           |
|-------------------|------------------|------------------|------------------|-----------------|
| Black Knot        | 60.55 $\pm$ 3.02 | 31.52 $\pm$ 1.80 | 7.93 $\pm$ 1.47  | -               |
| Extracted melanin | 58.23 $\pm$ 5.45 | 33.93 $\pm$ 1.62 | 5.64 $\pm$ 1.34  | 2.2 $\pm$ 2.51  |
| Chitin            | 24.39 $\pm$ 4.38 | 50.27 $\pm$ 6.26 | 25.34 $\pm$ 1.92 | -               |
| 1, 8-DHN Monomer  | 73.96 $\pm$ 2.02 | 26.04 $\pm$ 2.02 | -                | -               |
| Sepia melanin     | 46.77 $\pm$ 4.74 | 34.30 $\pm$ 2.22 | 17.60 $\pm$ 2.04 | 1.33 $\pm$ 0.85 |

**Table S3: Assignment of signals in the FTIR spectrum of extracted melanin.**

| IR Wavenumber ( $\text{cm}^{-1}$ ) | Peak Assignment                   |
|------------------------------------|-----------------------------------|
| 3100-3600                          | O-H stretching                    |
| 2800-3100                          | aliphatic/aromatic C-H stretching |
| 1550-1700                          | C=O stretching and C=C stretching |
| 1200-1400                          | C-O residues                      |
